# Supplementary material for: The anion exchange reaction of bis(isoquinoline) ionic liquids: self-assembly, crystal structures and thermal properties of ten novel d10 metal (Cu, Ag) halide/thiocyanate supramolecular polymers
Source: Royal Society of Chemistry journal article supplement (doi:10.1039/c2ce25103e), 2012-01-01
Supplement: c2ce25103e.pdf [file c2ce25103e.pdf]

Supplementary materials for

**The anion exchange reaction of bis(isoquinoline) ionic liquids:  
self-assembly, crystal structures and thermal properties of ten  
novel  $d^{10}$  metal (Cu, Ag) halide/thiocyanate supramolecular  
polymers**

Li-Sha Song , Hong-Mei Wang, Yun-Yin Niu,\* Hong-Wei Hou,\* and Yu Zhu

*College of Chemistry and Molecular Engineering, Zhengzhou University, Zhengzhou*

*450001, P. R. China*

**Table S1**

Selected bond lengths (Å) and bond angles (°) within the coordination spheres around the metal centers in complex **1-10**.

---

| {(BIQPT) <sub>2</sub> [Ag <sub>2</sub> I <sub>6</sub> ]} (1) |             |                        |             |                         |             |
|--------------------------------------------------------------|-------------|------------------------|-------------|-------------------------|-------------|
| I1-Ag1                                                       | 2.8246(5)   | I3-Ag1                 | 2.8203(5)   | Ag1-I2 <sup>1</sup>     | 2.9568(6)   |
| I2-Ag1                                                       | 2.8968(5)   | I2-Ag1 <sup>1</sup>    | 2.9568(5)   | Ag1-I2-Ag1 <sup>1</sup> | 85.162(14)  |
| I1-Ag1-I2 <sup>1</sup>                                       | 109.434(16) | I1-Ag1-I2              | 117.369(17) | I2-Ag1-I2 <sup>1</sup>  | 94.837(14)  |
| I3-Ag1-I1                                                    | 113.056(16) | I3-Ag1-I2 <sup>1</sup> | 113.695(17) | I3-Ag1-I2               | 107.273(16) |
| {(BIQBT)[CuI <sub>3</sub> ]} (2)                             |             |                        |             |                         |             |
| Cu1-I1                                                       | 2.5174(11)  | Cu1-I2                 | 2.5096(10)  | Cu1-I3                  | 2.4973(11)  |
| I2-Cu1-I1                                                    | 121.26(4)   | I3-Cu1-I1              | 122.60(4)   | I3-Cu1-I2               | 116.12(4)   |
| {(BIQHx)[Cu <sub>4</sub> I <sub>8</sub> ]·DMF} (3)           |             |                        |             |                         |             |
| I1-Cu1 <sup>1</sup>                                          | 2.6186(9)   | I2-Cu1                 | 2.7500(10)  | I2-Cu2                  | 2.5827(9)   |
| I1-Cu1                                                       | 2.6800(9)   | I3-Cu1                 | 2.7314(9)   | I3-Cu2                  | 2.5768(9)   |

---

|                                                                                      |            |                         |             |                          |            |
|--------------------------------------------------------------------------------------|------------|-------------------------|-------------|--------------------------|------------|
| I4-Cu2                                                                               | 2.4777(9)  | Cu1-I1 <sup>1</sup>     | 2.6187(9)   | Cu1-Cu2                  | 2.6309(12) |
| Cu1 <sup>1</sup> -I1-Cu1                                                             | 70.67(3)   | Cu2-I2-Cu1              | 59.02(3)    | Cu2-I3-Cu1               | 59.34(3)   |
| I1 <sup>1</sup> -Cu1-I1                                                              | 109.33(3)  | I1 <sup>1</sup> -Cu1-I1 | 111.93(3)   | I1-Cu1-I2                | 109.16(3)  |
| I1 <sup>1</sup> -Cu1-I3                                                              | 114.57(3)  | I1-Cu1-I3               | 109.13(3)   | I1 <sup>1</sup> -Cu1-Cu2 | 159.56(4)  |
| I3-Cu1-I2                                                                            | 102.45(3)  | Cu2-Cu1-I1              | 91.04(3)    | Cu2-Cu1-I2               | 57.32(3)   |
| Cu2-Cu1-I3                                                                           | 57.41(3)   | I2-Cu2-Cu1              | 63.66(3)    | I3-Cu2-I2                | 111.85(3)  |
| I3-Cu2-Cu1                                                                           | 63.26(3)   | I4-Cu2-I2               | 123.23(4)   | I4-Cu2-I3                | 123.81(4)  |
| I4-Cu2-Cu1                                                                           | 152.64(5)  |                         |             |                          |            |
| {(BIQBT) <sub>1.5</sub> [MoOS <sub>3</sub> Cu <sub>3</sub> I <sub>4</sub> ]-DMF} (4) |            |                         |             |                          |            |
| I1-Cu1                                                                               | 2.414(2)   | I2-Cu1                  | 2.950(2)    | I3-Cu2                   | 2.427(19)  |
| I4-Cu3                                                                               | 3.3863(19) | Mo1-Cu1                 | 2.6744(19)  | Mo1-Cu2                  | 2.6667(18) |
| Mo1-Cu3                                                                              | 2.6431(18) | Mo1-S1                  | 2.272(3)    | Mo1-S2                   | 2.267(3)   |
| Mo1-S3                                                                               | 2.268(3)   | Mo1-O1                  | 1.706(8)    | Cu1-S1                   | 2.283(3)   |
| Cu1-S2                                                                               | 2.279(3)   | Cu2-S2                  | 2.274(3)    | Cu2-S3                   | 2.272(3)   |
| Cu3-S1                                                                               | 2.263(4)   | Cu3-S3                  | 2.258(4)    | Cu2-Mo1-Cu1              | 81.33(6)   |
| Cu3-Mo1-Cu1                                                                          | 83.69(7)   | Cu3-Mo1-Cu2             | 82.50(6)    | S1-Mo1-Cu1               | 54.25(9)   |
| S1-Mo1-Cu2                                                                           | 117.41(9)  | S1-Mo1-Cu3              | 54.20(9)    | S2-Mo1-Cu1               | 54.17(9)   |
| S2-Mo1-Cu2                                                                           | 54.17(9)   | S2-Mo1-Cu3              | 120.36(10)  | S3-Mo1-Cu1               | 118.74(10) |
| S3-Mo1-Cu2                                                                           | 54.11(9)   | O1-Mo1-Cu1              | 130.7(3)    | O1-Mo1-S1                | 109.4(3)   |
| I1-Cu1-Mo1                                                                           | 149.44(10) | I1-Cu1-I2               | 117.97(8)   | Mo1-Cu1-I2               | 92.57(6)   |
| S1-Cu1-I1                                                                            | 119.20(11) | S1-Cu1-Mo1              | 53.85(9)    | S2-Cu1-I1                | 119.66(11) |
| S1-Cu1-Mo1                                                                           | 53.76(8)   | S2-Cu1-S1               | 107.47(12)  | Cu3-S3-Cu2               | 101.22(14) |
| Cu3-S3-Mo1                                                                           | 71.47(10)  | Mo1-S2-Cu1              | 72.07(10)   | Mo1-S2-Cu2               | 71.92(10)  |
| {(BIQH <sub>X</sub> )[Ag <sub>4</sub> Br <sub>6</sub> ]} <sub>n</sub> (5)            |            |                         |             |                          |            |
| Ag1-Br1                                                                              | 2.6665(10) | Ag1-Br2#2               | 2.7113(14)  | Ag1-Br2                  | 2.7180(12) |
| Ag1-Br1#3                                                                            | 2.7467(10) | Ag1-Ag1#2               | 3.2121(13)  | Br1-Ag1#3                | 2.7467(10) |
| Br2-Ag1#2                                                                            | 2.7113(14) | Br1-Ag1-Br2#2           | 121.12(3)   | Br1-Ag1-Br2              | 116.73(3)  |
| Br2#2-Ag1-Br2                                                                        | 95.79(4)   | Br1-Ag1-Br1#3           | 102.54(3)   | Br2#2-Ag1-Br1#3          | 109.35(4)  |
| Br2-Ag1-Br#3                                                                         | 111.45(4)  | Br1-Ag1-Ag1#2           | 108.081(19) | Br2#2-Ag1-Ag1#2          | 53.83(3)   |

|                                                                              |             |                                       |            |                                      |             |
|------------------------------------------------------------------------------|-------------|---------------------------------------|------------|--------------------------------------|-------------|
| Ag1-Br1-Ag1#3                                                                | 77.46(3)    | Br1#3-Ag1-Ag1#2                       | 149.38(2)  | Br2-Ag1-Ag1#2                        | 53.63(3)    |
| Ag1#2-Br2-Ag1                                                                | 72.54(3)    |                                       |            |                                      |             |
| {(BIQH <sub>X</sub> )[Ag <sub>4</sub> I <sub>6</sub> ]} <sub>n</sub> (6)     |             |                                       |            |                                      |             |
| I1-Ag1                                                                       | 2.8625(6)   | I2-Ag1                                | 2.8238(5)  | I2-Ag1 <sup>2</sup>                  | 2.9360(7)   |
| I1-Ag1 <sup>1</sup>                                                          | 2.8641(7)   | Ag1-Ag1 <sup>1</sup>                  | 3.3166(10) | I2-Ag1-Ag1 <sup>1</sup>              | 111.907(14) |
| I2 <sup>2</sup> -Ag1-Ag1 <sup>1</sup>                                        | 151.905(13) | Ag1-I1-Ag1 <sup>1</sup>               | 70.78(2)   | Ag1-I2-Ag1 <sup>2</sup>              | 84.098(17)  |
| I1-Ag1-I1 <sup>1</sup>                                                       | 99.876(18)  | I1 <sup>1</sup> -Ag1-I2 <sup>2</sup>  | 120.96(2)  | I1-Ag1-I2 <sup>2</sup>               | 105.055(19) |
| I1-Ag1-Ag1 <sup>1</sup>                                                      | 54.632(17)  | I1 <sup>1</sup> -Ag1-Ag1 <sup>1</sup> | 54.588(16) | I2-Ag1-I1 <sup>1</sup>               | 108.881(19) |
| I2-Ag1-I1                                                                    | 128.19(2)   | I2-Ag1-I2 <sup>2</sup>                | 95.901(17) |                                      |             |
| {(BIQH <sub>X</sub> )[Cu <sub>2</sub> (SCN) <sub>4</sub> ]} <sub>n</sub> (7) |             |                                       |            |                                      |             |
| Cu1-S1                                                                       | 2.4318(19)  | Cu1-S2 <sup>1</sup>                   | 2.4578(19) | Cu1-N1 <sup>2</sup>                  | 1.973(5)    |
| Cu1-N2                                                                       | 1.966(6)    | C14-N2-Cu1                            | 160.9(5)   | C13-N1-Cu1 <sup>2</sup>              | 157.3(5)    |
| S1-Cu1-S2 <sup>1</sup>                                                       | 109.26(7)   | N1 <sup>2</sup> -Cu1-S1               | 100.96(16) | N1 <sup>2</sup> -Cu1-S2 <sup>1</sup> | 114.26(15)  |
| N2-Cu1-S1                                                                    | 110.92(18)  | N2-Cu1-S2 <sup>1</sup>                | 100.35(17) | N2-Cu1-N1 <sup>2</sup>               | 121.1(2)    |
| C13-S1-Cu1                                                                   | 100.8(2)    | C14-S2-Cu1 <sup>1</sup>               | 98.9(2)    |                                      |             |
| {(BIQBT)[Cu <sub>2</sub> (SCN) <sub>4</sub> ]} <sub>n</sub> (8)              |             |                                       |            |                                      |             |
| Cu1-N2#1                                                                     | 1.984(2)    | Cu1-N3#2                              | 1.999(2)   | Cu1-S2                               | 2.4101(7)   |
| Cu1-S1                                                                       | 2.4408(7)   | N2-Cu1#1                              | 1.984(2)   | N3-Cu1#2                             | 1.999(2)    |
| N2#1-Cu1-N3#2                                                                | 119.14(9)   | N2#1-Cu1-S2                           | 110.76(7)  | N3#2-Cu1-S2                          | 101.75(6)   |
| N2#1-Cu1-S1                                                                  | 103.74(6)   | N3#2-Cu1-S1                           | 111.40(6)  | S2-Cu1-S1                            | 110.08(3)   |
| C12-N2-Cu1#1                                                                 | 161.40(19)  | C13-N3-Cu1#2                          | 153.54(18) | C12-S1-Cu1                           | 95.25(8)    |
| C13-S2-Cu1                                                                   | 98.63(8)    |                                       |            |                                      |             |
| {(BIQPP)[Cu <sub>2</sub> (SCN) <sub>4</sub> ]} <sub>n</sub> (9)              |             |                                       |            |                                      |             |
| Cu1-S1                                                                       | 2.4755(12)  | Cu1-S2                                | 2.5018(12) | Cu1-N2 <sup>1</sup>                  | 1.956(4)    |
| Cu1-N3 <sup>2</sup>                                                          | 1.944(3)    | N2-Cu1 <sup>1</sup>                   | 1.956(4)   | N3-Cu1 <sup>3</sup>                  | 1.944(3)    |
| S1-Cu1-S2                                                                    | 102.71(4)   | N2 <sup>1</sup> -Cu1-S1               | 100.63(9)  | N2 <sup>1</sup> -Cu1-S2              | 108.78(11)  |
| N3 <sup>2</sup> -Cu1-S1                                                      | 105.34(11)  | N3 <sup>2</sup> -Cu1-S2               | 108.40(10) | N3 <sup>2</sup> -Cu1-N2 <sup>1</sup> | 127.88(14)  |
| C12-S1-Cu1                                                                   | 98.43(12)   | C13-S2-Cu1                            | 106.85(13) | C12-N2-Cu1 <sup>1</sup>              | 159.4(3)    |
| C13-N3-Cu1 <sup>3</sup>                                                      | 170.4(3)    |                                       |            |                                      |             |

---

| {(BIQEH)[Cu <sub>2</sub> (SCN) <sub>4</sub> ]} <sub>n</sub> (10) |           |                           |            |                                       |            |
|------------------------------------------------------------------|-----------|---------------------------|------------|---------------------------------------|------------|
| Cu1- S1                                                          | 2.3984(8) | Cu1-S2                    | 2.3980(8)  | Cu1- N2 <sup>1</sup>                  | 2.012(3)   |
| Cu1- N3 <sup>2</sup>                                             | 1.960(2)  | N2- Cu1 <sup>1</sup>      | 2.012(3)   | N3- Cu1 <sup>3</sup>                  | 1.960(2)   |
| S2- Cu1- S1                                                      | 96.58(3)  | N3 <sup>2</sup> - Cu1- S1 | 121.77(8)  | N3 <sup>2</sup> - Cu1-N2 <sup>1</sup> | 113.44(11) |
| N2 <sup>1</sup> - Cu1- S1                                        | 106.02(7) | N3 <sup>2</sup> - Cu1- S2 | 103.37(9)  | C11-S1-Cu1                            | 96.57(9)   |
| N2 <sup>1</sup> - Cu1- S2                                        | 114.77(8) | C12-S2-Cu1                | 100.07(10) | C11-N2-Cu1 <sup>1</sup>               | 158.1(2)   |
| C12-N3-Cu1 <sup>3</sup>                                          | 160.5(3)  |                           |            |                                       |            |

---

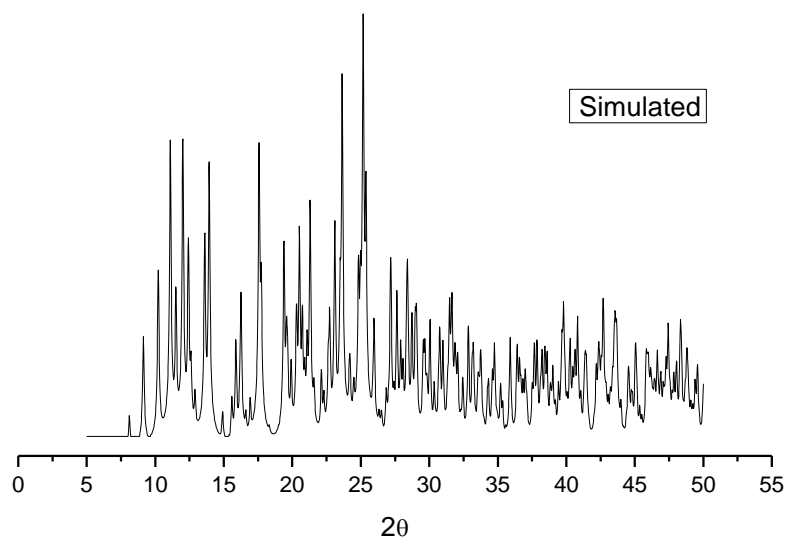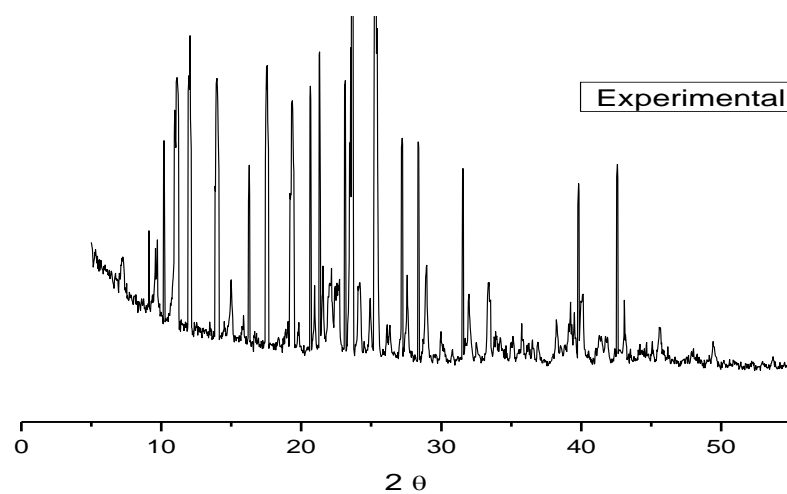

**Fig. S1** Simulated and experimental PXRD pattern of compound **2**.

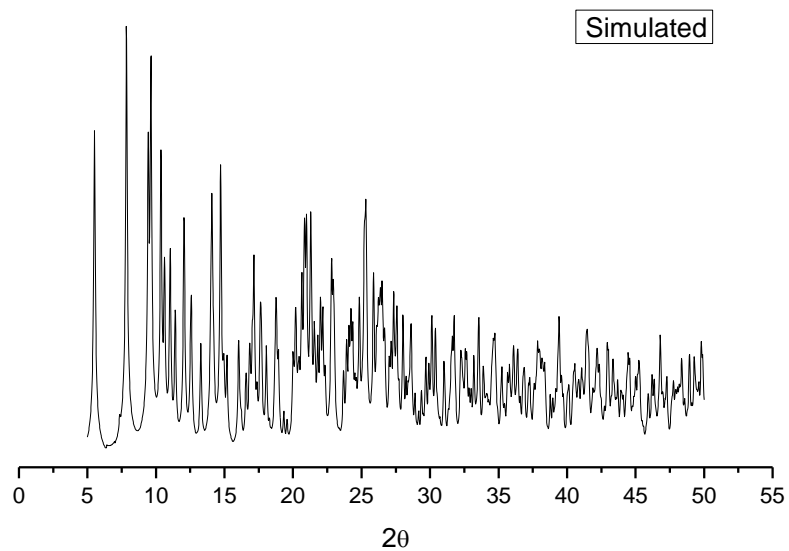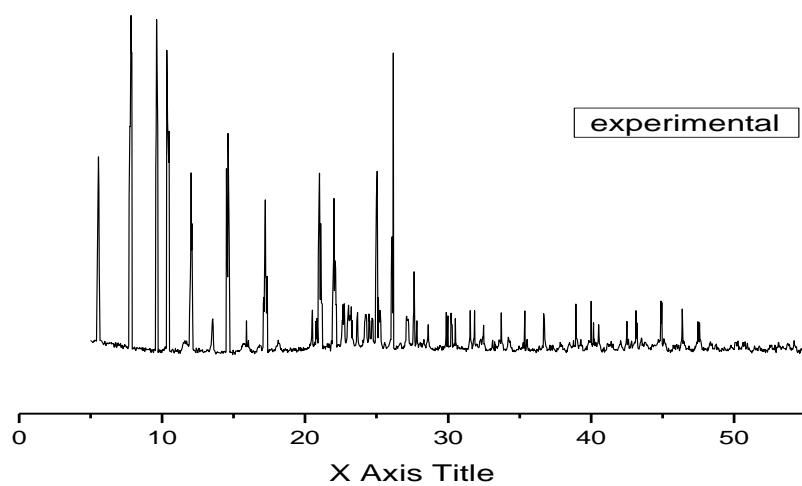

**Fig. S2** Simulated and experimental PXRD pattern of compound **4**.

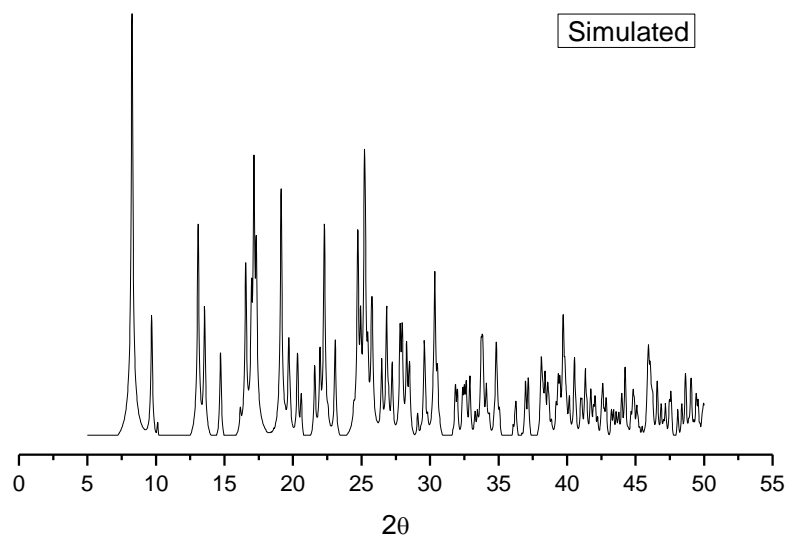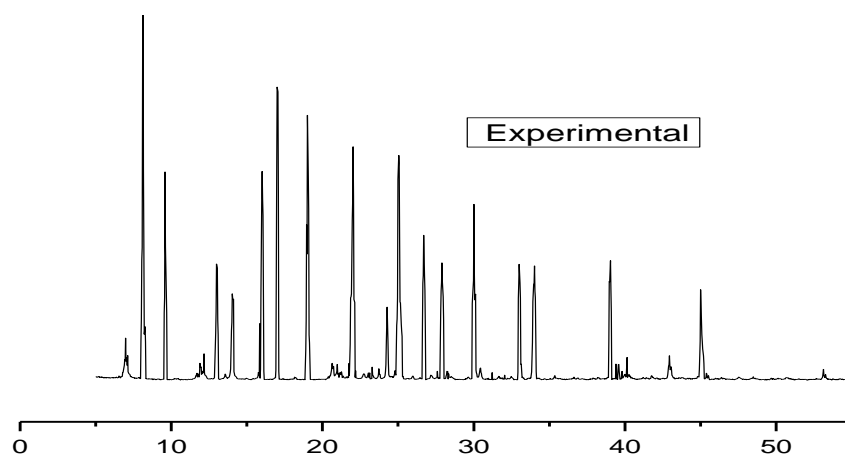

**Fig. S3** Simulated and experimental PXRD pattern of compound **10**.
